# Supplementary material for: Salmonella Extracellular Polymeric Substances Modulate Innate Phagocyte Activity and Enhance Tolerance of Biofilm-Associated Bacteria to Oxidative Stress
Source: MDPI journal article supplement (doi:10.3390/microorganisms8020253), 2020-02-13
Supplement: s1 [file s1]

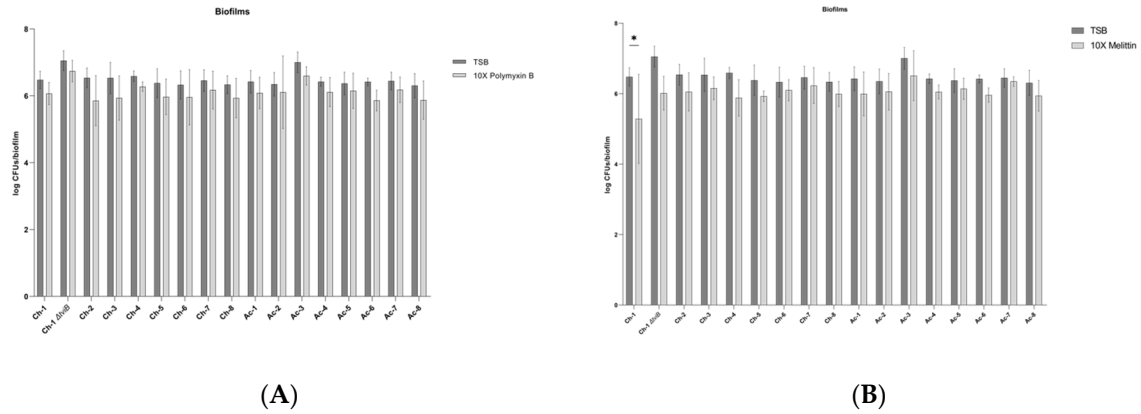

**Figure 1.** Biofilm tolerance of *S. Typhi* clinical isolates. A panel of 8 chronic (Ch-1 to Ch-8) and 8 acute (Ac-1 to Ac-8) clinical isolates challenged with (A) polymyxin B or (B) melittin supplied at 2.4  $\mu$ g/ml polymyxin B and 100  $\mu$ g/mL melittin. Significance was identified by two-way ANOVA with Sidak multiple comparison correction (\*,  $P < 0.05$ ) ( $n = 3$ , daily experiments conducted in triplicate). Error bars indicate SD.

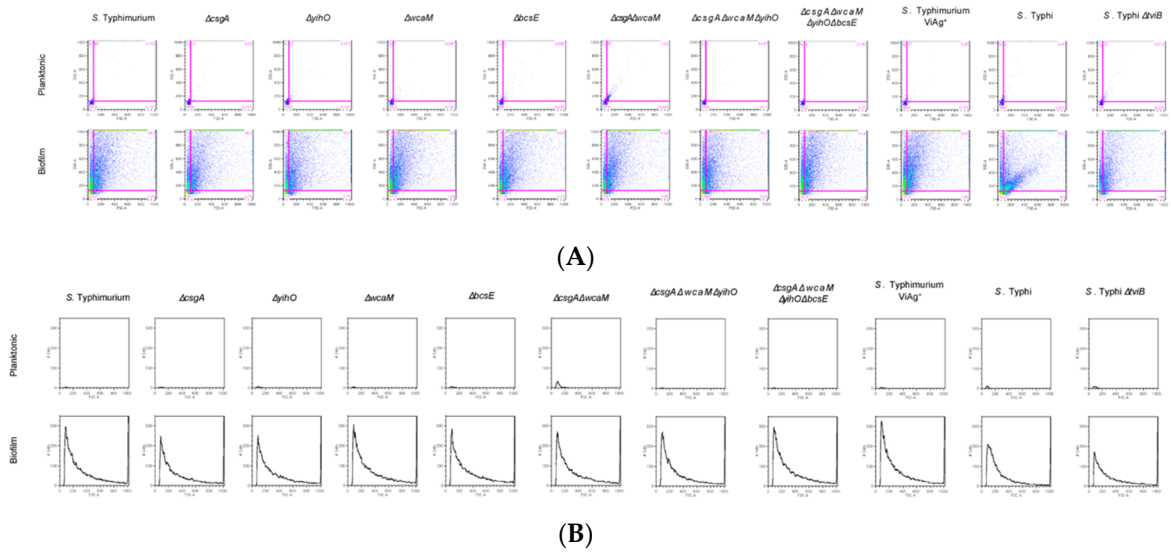

**Figure S2.** Analysis of biofilm aggregates. Biofilm collection methods yield aggregate populations of consistent size and granularity (A). Forward scatter (FSC) and side scatter (SSC) gates were set with planktonic bacteria for each WT and EPS mutant. As expected, the only population detected was small and agranular indicating planktonic bacteria. Applying the gates to biofilm aggregates demonstrates aggregates are distinct from planktonic cells in size and granularity. (B) Histograms include events only from quadrant II and quantify the distribution of biofilm aggregate sizes. Aggregates from both serovars and each EPS mutant had similar distribution; small aggregates were predominantly produced but there is a normal distribution as size increases for all strains and thus variation between WTs and mutants is minimal.

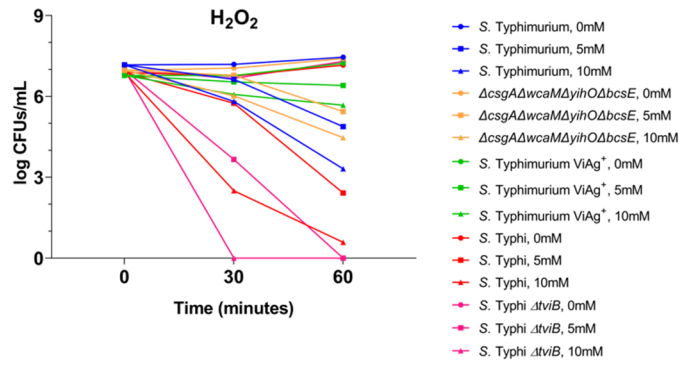

(A)

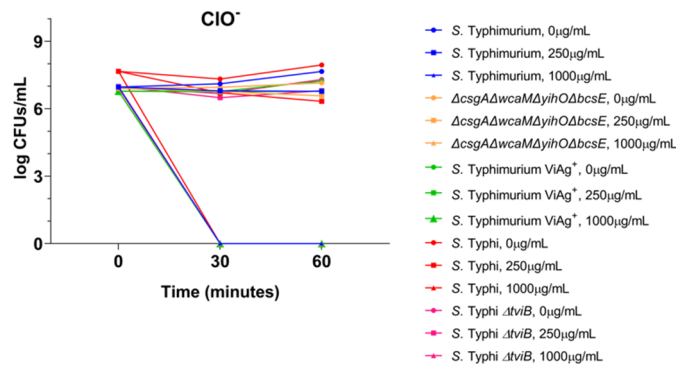

(B)

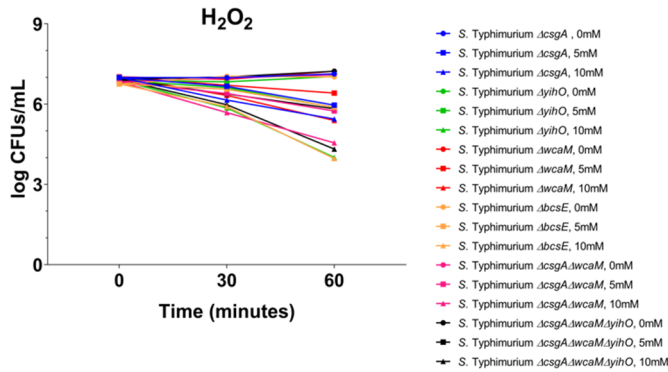

(C)

**Figure S3.** Planktonic sensitivity to oxidative species. JSG4383 used for WT *S. Typhi*. (A,B) Initial sensitivity tests of planktonic *Salmonella* to  $\text{H}_2\text{O}_2$  and  $\text{ClO}^-$  and basis for range of concentrations tested to identify the MIC for each compound. (C) Planktonic sensitivity to  $\text{H}_2\text{O}_2$  for EPS mutants. Each *S. Typhimurium* EPS mutant demonstrated planktonic sensitivity to the same range of  $\text{H}_2\text{O}_2$  as WT.

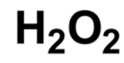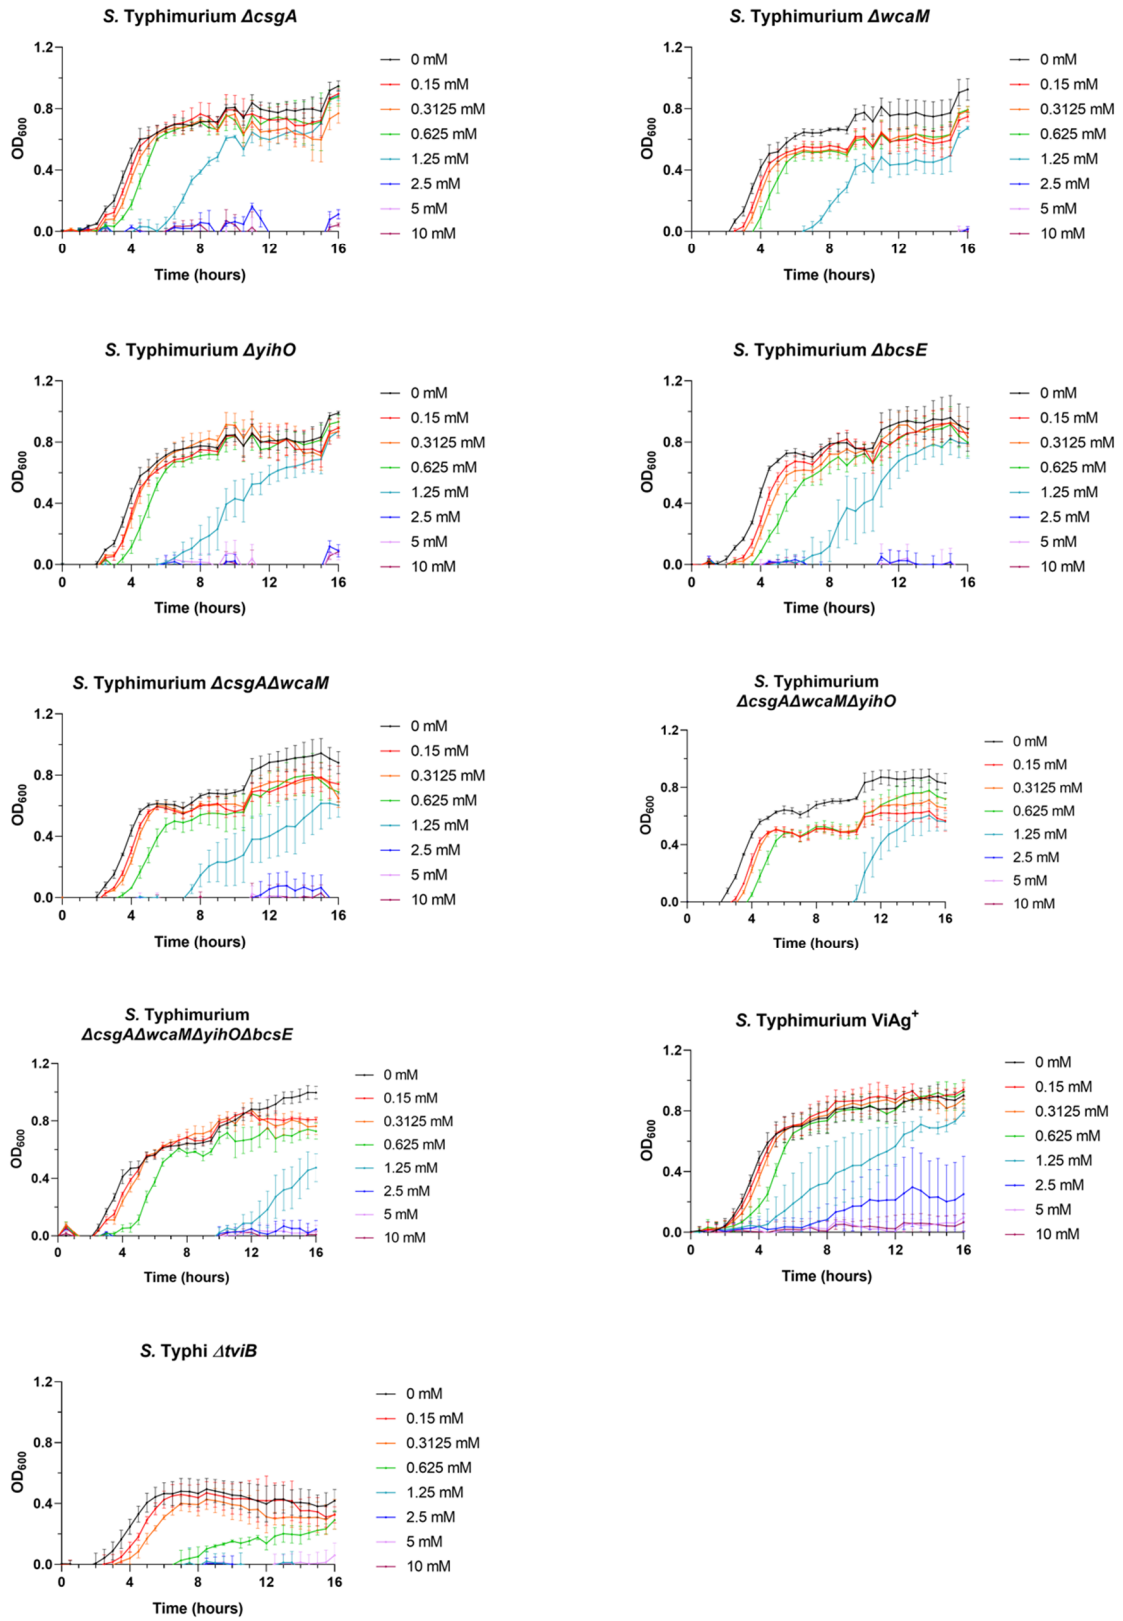

(A)

**CIO<sup>-</sup>**

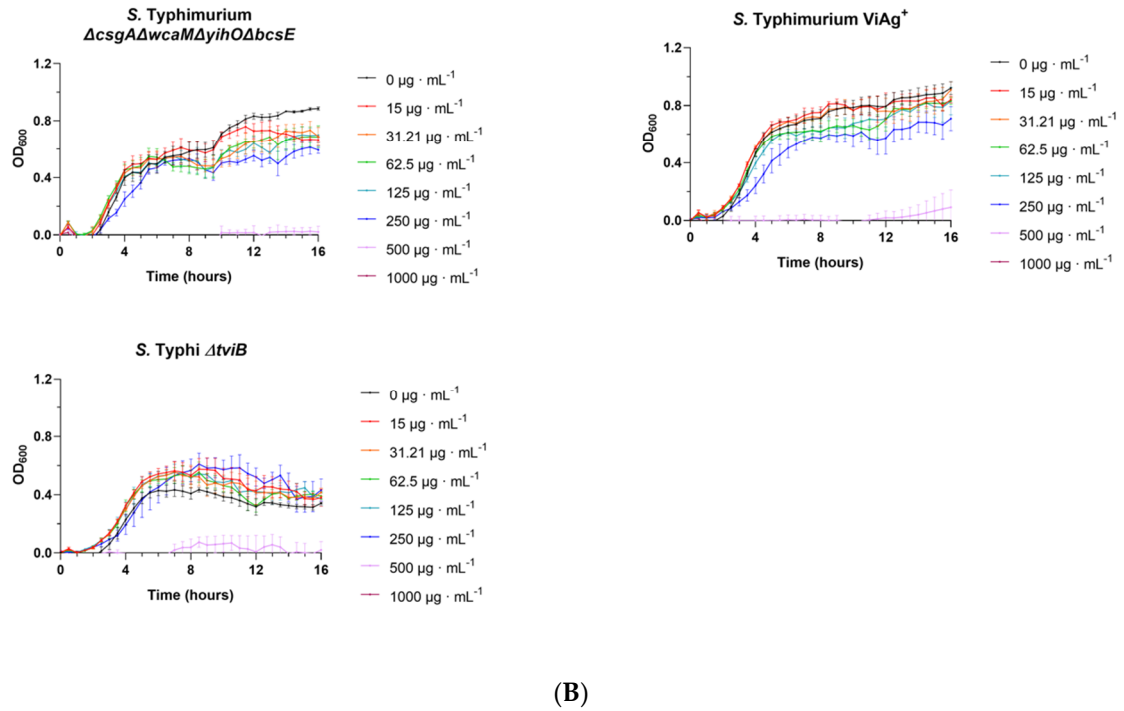

**(B)**

**Figure S4.** EPS mutant planktonic MICs. The MICs of H<sub>2</sub>O<sub>2</sub> and ClO<sup>-</sup> was verified for each EPS mutant during planktonic growth. **(A)** The H<sub>2</sub>O<sub>2</sub> MIC was equal to WT for *S. Typhimurium* EPS mutants and increased only by the addition of Vi antigen to *S. Typhimurium*. *S. Typhi*  $\Delta tviB$  MIC of H<sub>2</sub>O<sub>2</sub> was reduced to half of the WT MIC. **(B)** The ClO<sup>-</sup> MIC was equal to WT for each of the EPS mutants tested. Individual *S. Typhimurium* EPS mutants were not investigated since *S. Typhimurium*  $\Delta csgA\Delta wcaM\Delta yihO\Delta bcsE$  demonstrated no difference from WT.

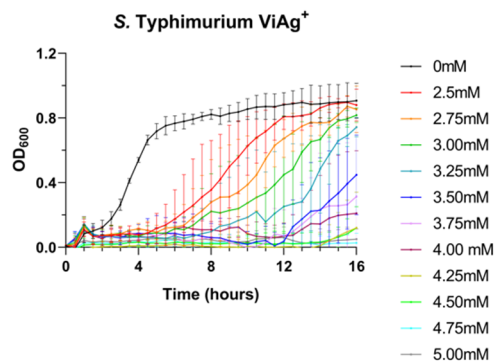

**Figure S5.** *S. Typhimurium* Vi antigen<sup>+</sup> planktonic MIC (H<sub>2</sub>O<sub>2</sub>). The MIC of H<sub>2</sub>O<sub>2</sub> was further investigated for *S. Typhimurium* Vi antigen<sup>+</sup> during planktonic growth because it demonstrated growth at the WT MIC (2.5 mM). The exact MIC of *S. Typhimurium* Vi antigen<sup>+</sup> was 4.25 mM H<sub>2</sub>O<sub>2</sub>, indicating a 70% increase in the planktonic MIC.
